# Supplementary material for: Host fecal DNA specific methylation signatures mark gut dysbiosis and inflammation in children affected by autism spectrum disorder
Source: PubMed Central journal article supplement (PMC10598023; doi:10.1038/s41598-023-45132-0), 2023-10-24

A

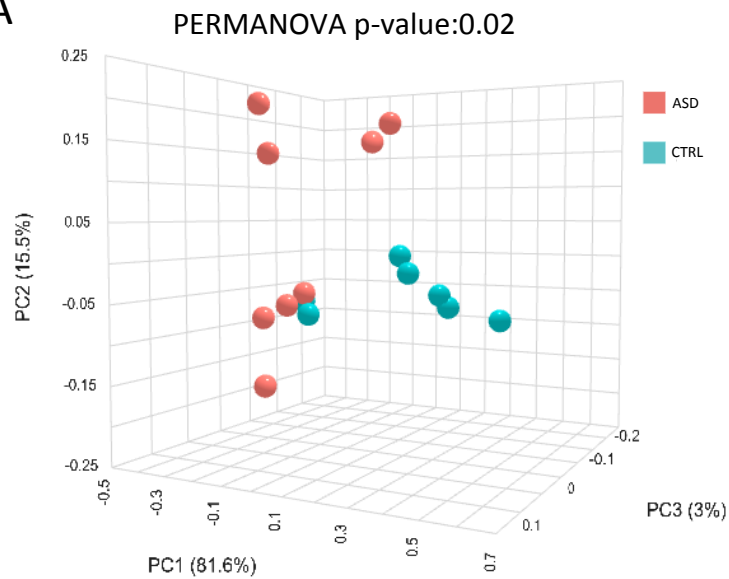

B

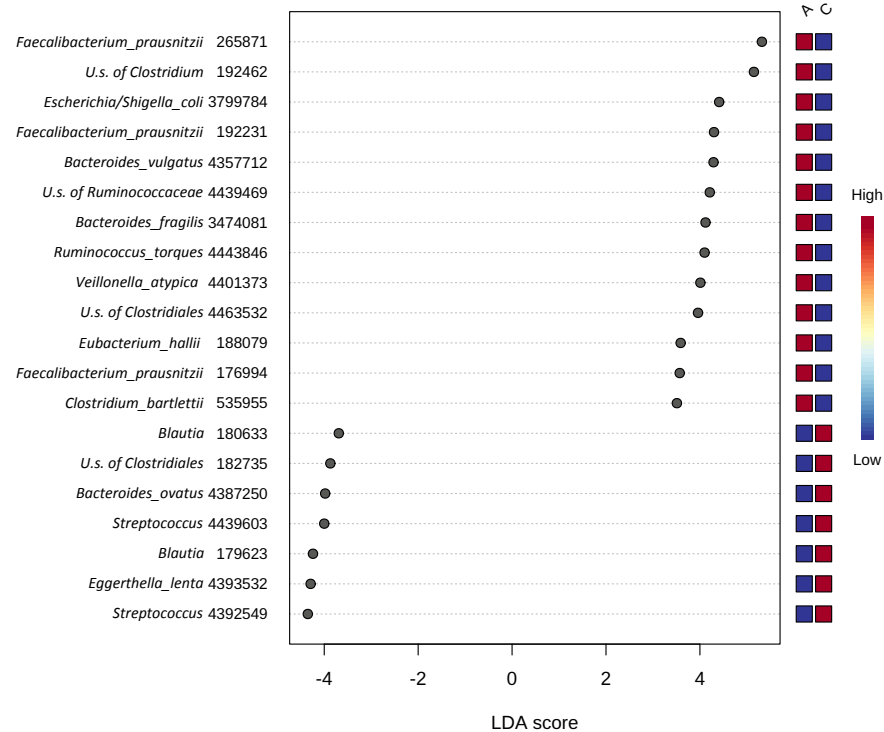

C

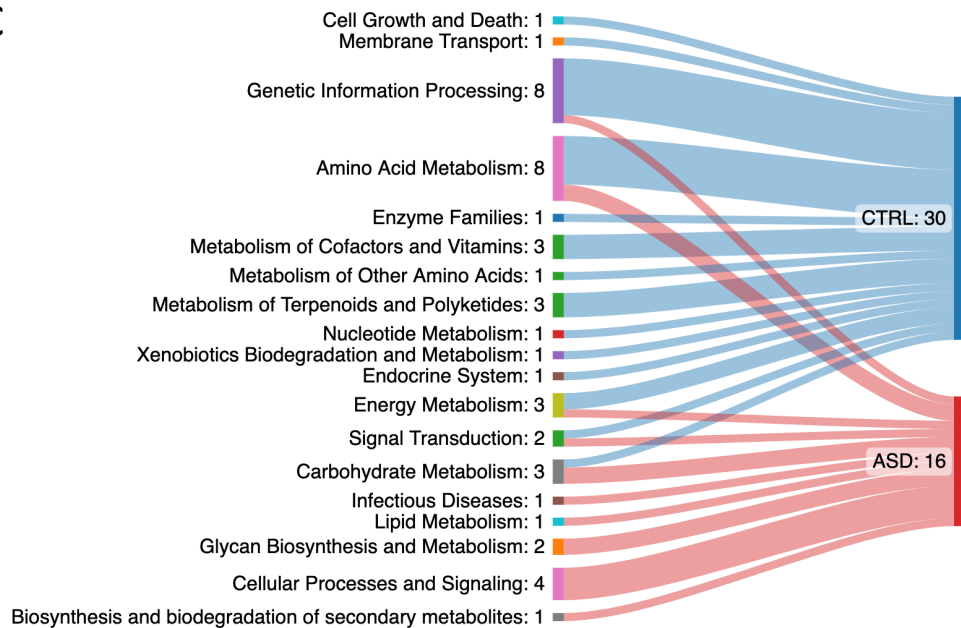

D

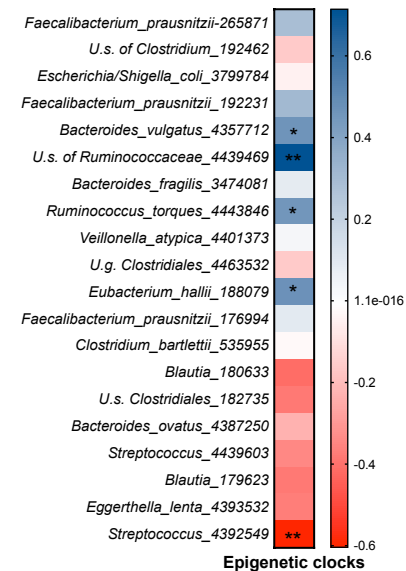

Supplement: 41598_2023_45132_MOESM2_ESM.pdf [file 41598_2023_45132_MOESM2_ESM.pdf]
